# Supplementary material for: Insulin Modulates the Bioenergetic and Thermogenic Capacity of Rat Brown Adipocytes In Vivo by Modulating Mitochondrial Mosaicism
Source: MDPI journal article supplement (doi:10.3390/ijms21239204), 2020-12-03
Supplement: s1 [file s1]

**Supplementary Figure:**

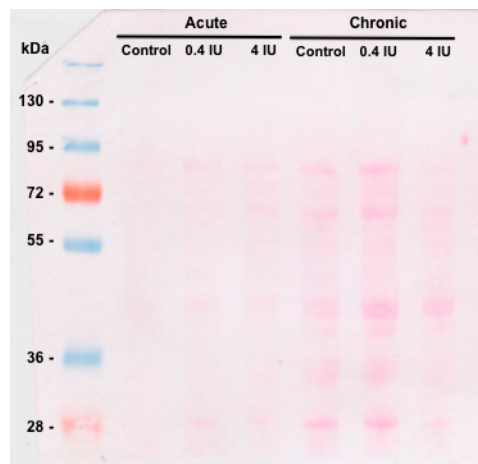

**Figure S1.** Ponceau red staining was used to show no differences in total protein quantities.
